# Supplementary material
Source: PubMed Central journal article supplement (PMC2217662)
Supplement: 1471-2105-8-S9-S4-S1.pdf [file 1471-2105-8-S9-S4-S1.pdf]

**Document Clustering Performance Decrease as Summary Compression Ratio Increase for Each Summarization Method**

|                                 |                                          |                                                                                                                                                                                                                                                                                                                                                                                                                                                                                                                                                                                                                                                                                                                                                                                                                                                                                                                                                                                                                                                                                                                                                                                                                                                                                                                                                                                                                                                                            |
|---------------------------------|------------------------------------------|----------------------------------------------------------------------------------------------------------------------------------------------------------------------------------------------------------------------------------------------------------------------------------------------------------------------------------------------------------------------------------------------------------------------------------------------------------------------------------------------------------------------------------------------------------------------------------------------------------------------------------------------------------------------------------------------------------------------------------------------------------------------------------------------------------------------------------------------------------------------------------------------------------------------------------------------------------------------------------------------------------------------------------------------------------------------------------------------------------------------------------------------------------------------------------------------------------------------------------------------------------------------------------------------------------------------------------------------------------------------------------------------------------------------------------------------------------------------------|
| <p><i>Alzheimer Disease</i></p> | <p><b>Document Cluster Model</b></p>     |                                                                                                                                                                                                                                                                                                                                                                                                                                                                                                                                                                                                                                                                                                                                                                                                                                                                                                                                                                                                                                                                                                                                                                                                                                                                                                                                                                                                                                                                            |
|                                 | <p><b>Top 7 Sentences as Summary</b></p> | <ul style="list-style-type: none"> <li>• Tau protein extracted from filaments of familial multiple system tauopathy with presenile dementia shows a minor 72-kDa band and two major bands of 64 and 68 kDa that contain mainly hyperphosphorylated four-repeat tau isoforms of 383 and 412 amino acids.</li> <li>• The central pathological cause of Alzheimer disease (AD) is hypothesized to be an excess of beta-amyloid (Abeta) which accumulates into toxic fibrillar deposits within extracellular areas of the brain. These deposits disrupt neural and synaptic function and ultimately lead to neuronal degeneration and dementia</li> <li>• In dementia of Alzheimer type (DAT), cerebral glucose metabolism is reduced in vivo, and enzymes involved in glucose breakdown are impaired in post-mortem brain tissue</li> <li>• Alzheimer's disease (AD), a progressive, degenerative disorder of the brain, is believed to be the most common cause of dementia amongst the elderly</li> <li>• The fundamental cause of Alzheimer dementia is proposed to be Alzheimer disease, i.e. the neurobiological abnormalities in Alzheimer brain</li> <li>• Alzheimer's disease (AD) is a degenerative disease of the brain, and the most common form of dementia</li> <li>• Regional quantitative analysis of NFT in brains of non-demented elderly persons: comparisons with findings in brains of late-onset Alzheimer's disease and limbic NFT dementia.</li> </ul> |

|                              |                                          |                                                                                                                                                                                                                                                                                                                                                                                                                                                                                                                                                                                                                                                                                                                                                                                                                                                                                                                                                                                                                                                                                                                                                                                                                                            |
|------------------------------|------------------------------------------|--------------------------------------------------------------------------------------------------------------------------------------------------------------------------------------------------------------------------------------------------------------------------------------------------------------------------------------------------------------------------------------------------------------------------------------------------------------------------------------------------------------------------------------------------------------------------------------------------------------------------------------------------------------------------------------------------------------------------------------------------------------------------------------------------------------------------------------------------------------------------------------------------------------------------------------------------------------------------------------------------------------------------------------------------------------------------------------------------------------------------------------------------------------------------------------------------------------------------------------------|
|                              | <p><b>Document Cluster Model</b></p>     | 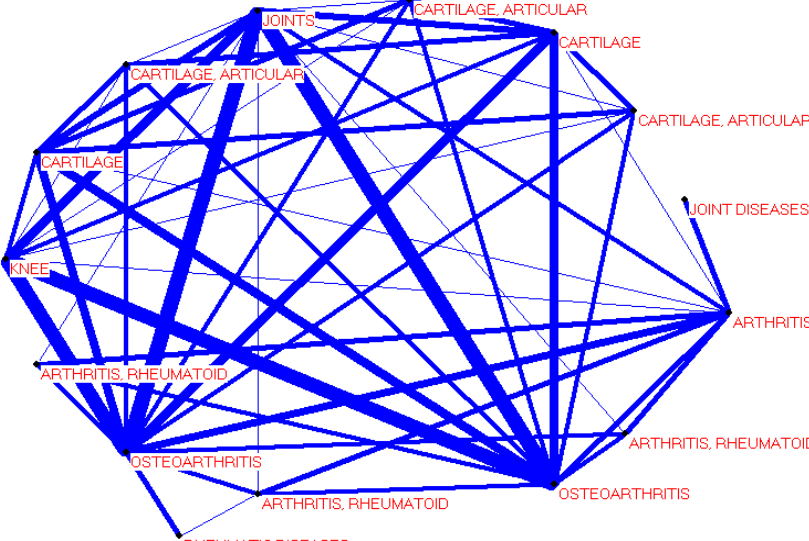                                                                                                                                                                                                                                                                                                                                                                                                                                                                                                                                                                                                                                                                                                                                                                                                                                                                                                                                                                                                                                                                                                                                                         |
| <p><i>Osteoarthritis</i></p> | <p><b>Top 7 Sentences as Summary</b></p> | <ul style="list-style-type: none"> <li>• Pathological joint events in both inflammatory arthritis and degenerative arthritis are perpetuated by complex cytokine interactions</li> <li>• In 8, who had severe osteoarthritis, a bicompartamental ICLH (Imperial College-London Hospital) prosthesis was used; in 12, with moderate arthritis, the medial side of the joint was replaced by a unicompartmental Brigham prosthesis</li> <li>• In old scaphoid fractures, the degenerative arthritis begins with an impingement between radial styloid process and proximal pole of the scaphoid, and then reaches the lunocapitate joint. A dorsi flexion by instability is then constant</li> <li>• These patients suffered from painful posttraumatic degenerative arthritis after tarsometatarsal joint fracture-dislocation</li> <li>• More than 85% of all adult cadavers demonstrate degenerative arthritis of the radial subsesamoid joint</li> <li>• OBJECTIVE: Osteoarthritis (OA) is the most common type of arthritis; involvement of joints in the hand is highly prevalent, especially in the elderly</li> <li>• Dysfunction of the pisotriquetral joint: degenerative arthritis treated by excision of the pisiform</li> </ul> |
